# Supplementary material for: Metal–organic framework-guided growth of Mo2C embedded in mesoporous carbon as a high-performance and stable electrocatalyst for the hydrogen evolution reaction
Source: Royal Society of Chemistry journal article supplement (doi:10.1039/c6ta06553h), 2016-01-01
Supplement: c6ta06553h1.pdf [file c6ta06553h1.pdf]

## Electronic Supplementary Information (ESI)

Metal organic framework-guided growth of Mo<sub>2</sub>C embedded in mesoporous carbon as high-performance and stable electrocatalyst for hydrogen evolution reaction

M. Qamar,<sup>\*a</sup> A. Adam,<sup>b</sup> B. Merzougui,<sup>c</sup> A. Helal,<sup>a</sup> O. Abdulhamid,<sup>a</sup> M. N. Siddiqui,<sup>b</sup>

<sup>a</sup>Center of Excellence in Nanotechnology (CENT), <sup>b</sup>Department of Chemistry, King Fahd University of Petroleum and Minerals, Dhahran 31261, Saudi Arabia.

<sup>c</sup>Qatar Environment & Energy Research Institute, Qatar Foundation, Doha 5825, Qatar.

\*Corresponding author: [qamar@kfupm.edu.sa](mailto:qamar@kfupm.edu.sa)

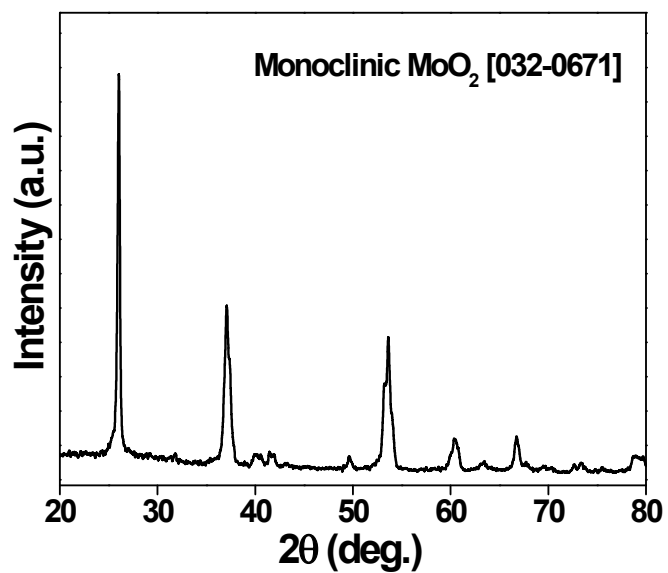

Figure S1. XRD spectra of MoO<sub>2</sub> obtained at 800 °C annealed under N<sub>2</sub> gas.

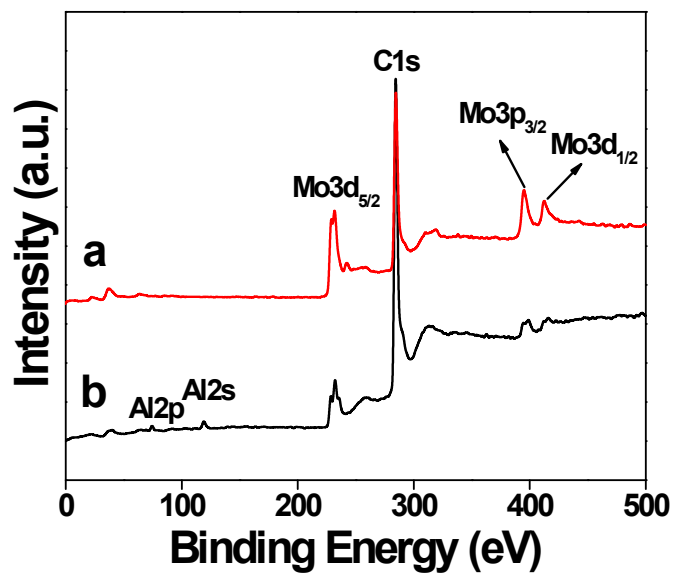

Figure S2. XPS survey spectra of Mo<sub>2</sub>C/C before (a) and after Al removal (b).

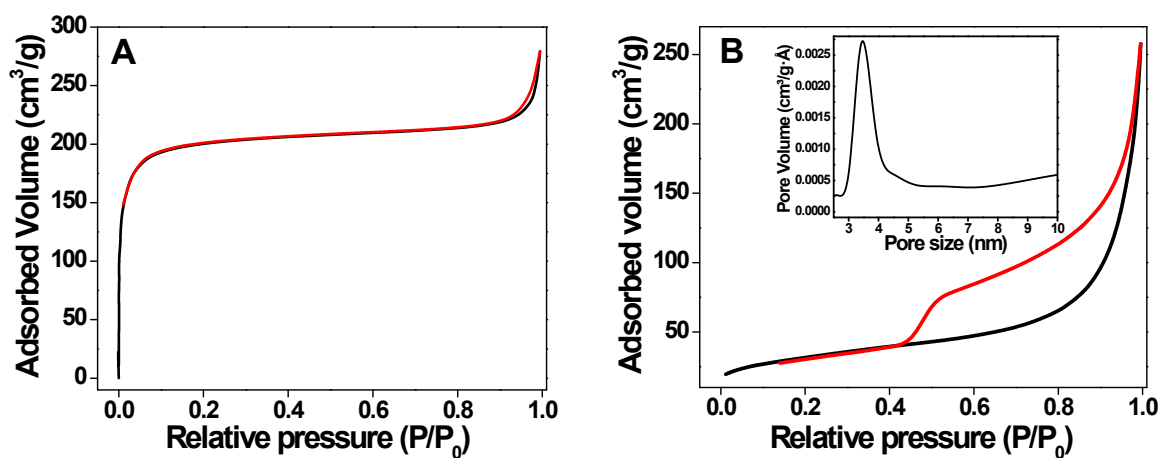

**Figure S3.** BET isotherms of (A) MIL-53(Al) and (B) Mo<sub>2</sub>C/C nanocomposite together with pore size distribution (Fig. B inset).

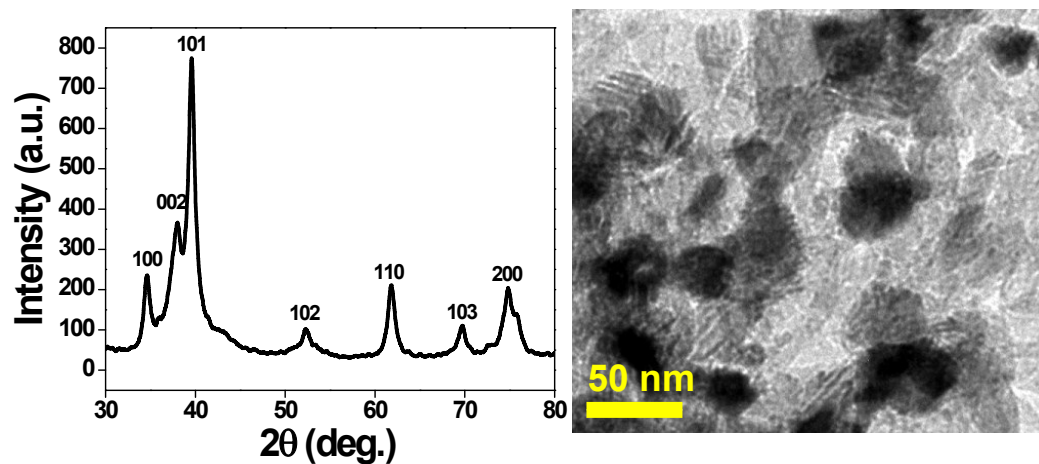

**Figure S4.** XRD and TEM of Mo<sub>2</sub>C/XC.

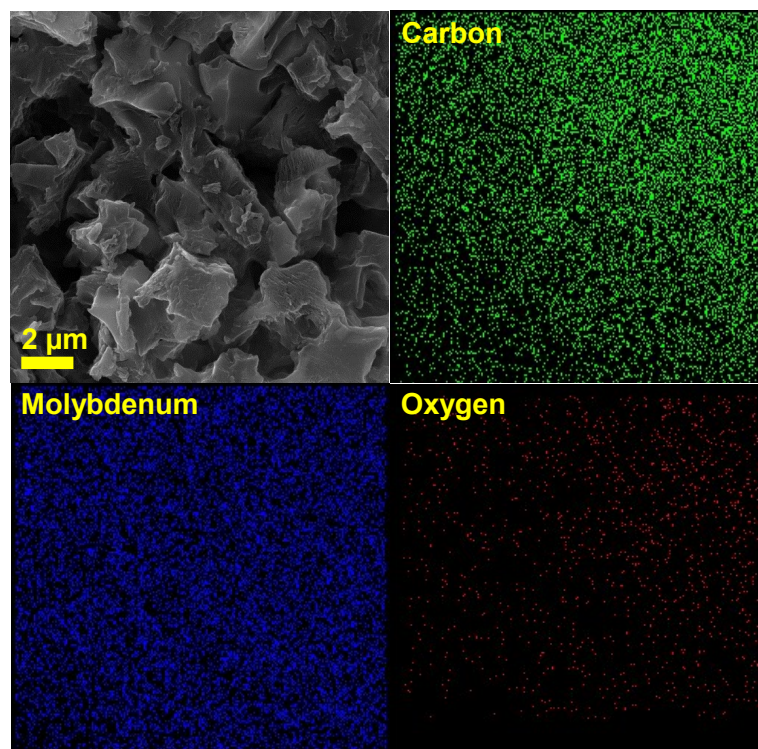

**Figure S5.** SEM and elemental mapping of carbon, molybdenum and oxygen present in  $\text{Mo}_2\text{C}/\text{C}$ .

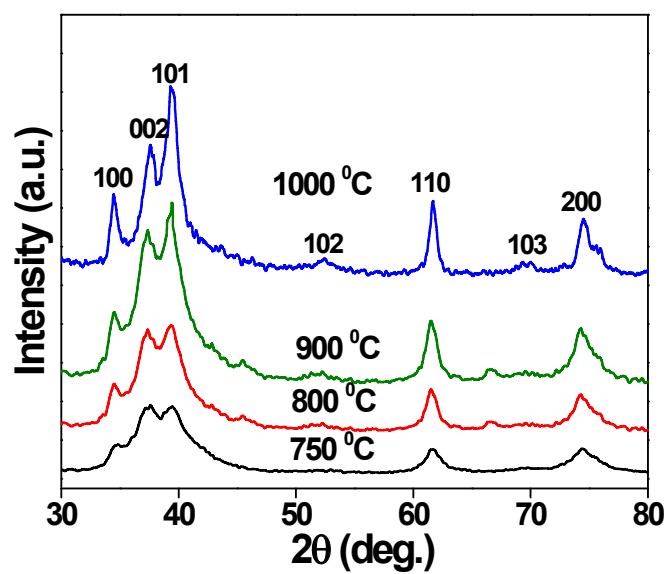

**Figure S6.** XRD spectra of  $\text{Mo}_2\text{C}/\text{C}$  carburized at different temperature.

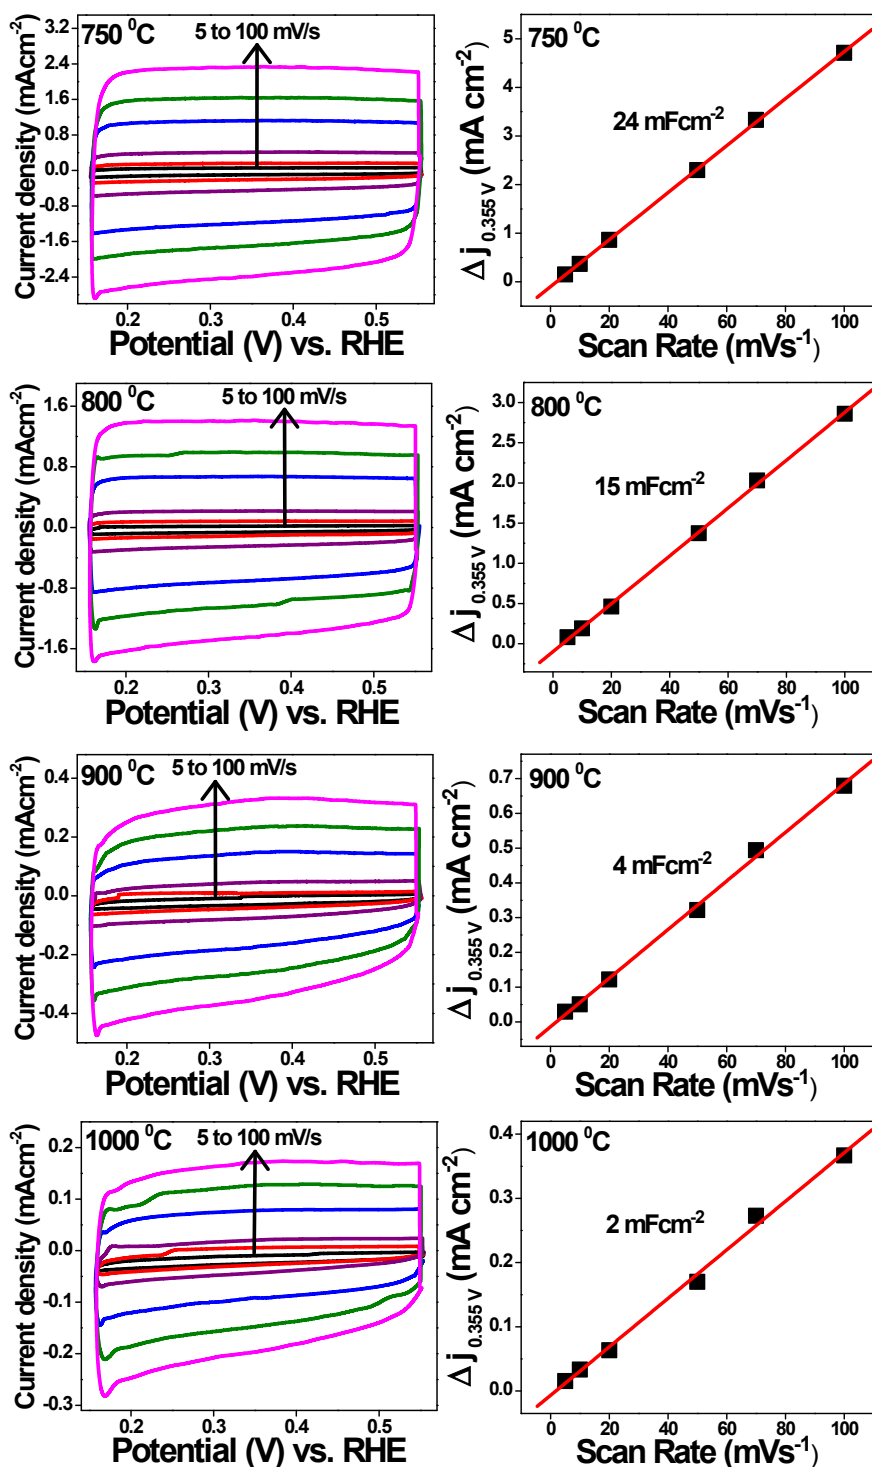

**Figure S7.** Effect of annealing temperature on cyclic voltammograms (CVs) of Mo<sub>2</sub>C/C recorded at different scan rates from 5 to 100 mVs<sup>-1</sup>, and their corresponding plots of the current density at 0.355 V<sub>RHE</sub> vs. scan rate. CVs were recorded in non-faradic region. The linear slopes are equivalent to twice of the electrochemical double layer capacitance ( $C_{dl}$ ).

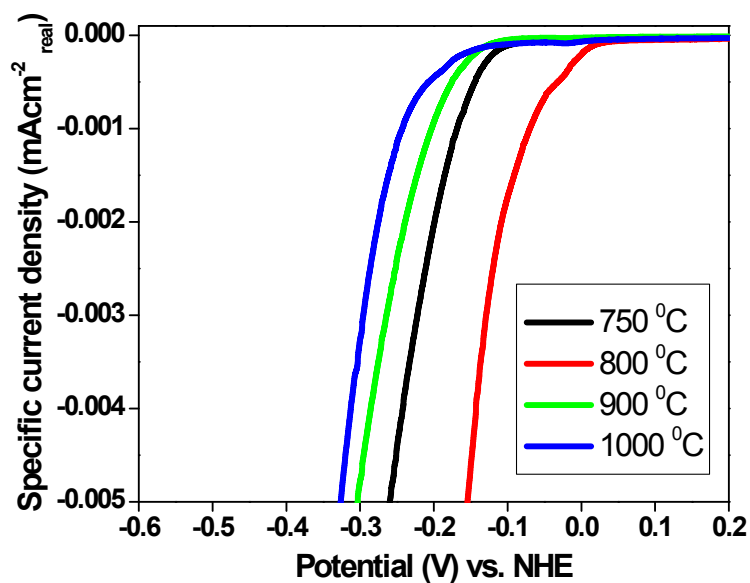

**Figure S8.** Potentiodynamic curves showing the effect of temperature on specific current density calculated with real surface area.

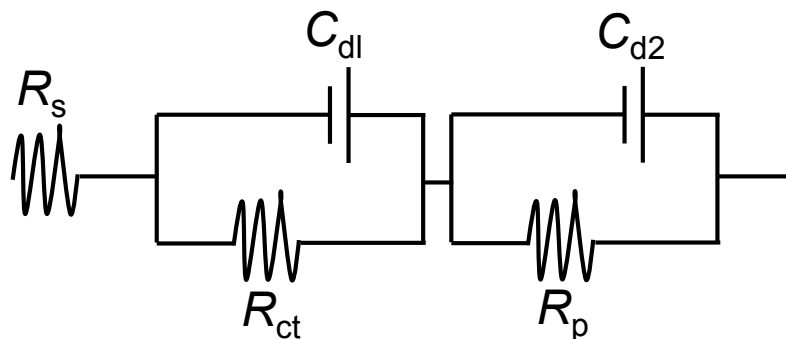

**Figure S9.** Two time constant electrical equivalent circuit model utilized to fit the electrochemical impedance (EIS) results of hydrogen evolution reaction.  $R_s$  – series resistance,  $C_{dl}$  and  $C_{d2}$  are double layer capacitance,  $R_{ct}$  – charge transfer resistance for HER,  $R_p$  – resistance related to the surface porosity.

**Table S1.** Comparison of electrocatalysts (Mo<sub>2</sub>C) for HER.

| Catalysts                                | Electrolyte                           | Overpotential at 10 mA cm <sup>-2</sup><br>(mV) | Tafel slope<br>(mV dec <sup>-1</sup> ) | Catalyst loading<br>(mg cm <sup>-2</sup> ) |
|------------------------------------------|---------------------------------------|-------------------------------------------------|----------------------------------------|--------------------------------------------|
| $\alpha$ -Mo <sub>2</sub> C <sup>1</sup> | 0.5 M H <sub>2</sub> SO <sub>4</sub>  | 198                                             | 56                                     | 0.102                                      |
| $\alpha$ -Mo <sub>2</sub> C <sup>1</sup> | 1 M KOH                               | 176                                             | 58                                     | 0.102                                      |
| Mo <sub>2</sub> C/CNT <sup>2</sup>       | 0.1 M HClO <sub>4</sub>               | 250                                             | 251                                    | 8.2                                        |
| Mo <sub>2</sub> C/CXG <sup>2</sup>       | 0.1 M HClO <sub>4</sub>               | 170                                             | 264                                    | 6.3                                        |
| Mo <sub>2</sub> C/CNT <sup>3</sup>       | 0.5 M H <sub>2</sub> SO <sub>4</sub>  | 190                                             | 63                                     | 0.65-0.67                                  |
| Mo <sub>2</sub> C/CNT-GR <sup>3</sup>    | 0.5 M H <sub>2</sub> SO <sub>4</sub>  | 130                                             | 58                                     | 0.65-0.67                                  |
| Mo <sub>2</sub> C/GR <sup>4</sup>        | 0.5 M H <sub>2</sub> SO <sub>4</sub>  | 242                                             | 82                                     | 0.65-0.67                                  |
| Mo <sub>2</sub> C/CNT <sup>4</sup>       | 0.1 M HClO <sub>4</sub>               | 152                                             | 55.2                                   | 2                                          |
| Bulk Mo <sub>2</sub> C <sup>4</sup>      | 0.1 M HClO <sub>4</sub>               | ~300                                            | 87.6                                   | 2                                          |
| 3DHP-Mo <sub>2</sub> C <sup>5</sup>      | 0.5 M H <sub>2</sub> SO <sub>4</sub>  | 97                                              | 60                                     | 0.28                                       |
| Mo <sub>2</sub> C/NCNTs <sup>6</sup>     | 0.5 M H <sub>2</sub> SO <sub>4</sub>  | 147                                             | 71                                     | 3                                          |
| Mo <sub>2</sub> C/CNTs <sup>6</sup>      | 0.5 M H <sub>2</sub> SO <sub>4</sub>  | 179                                             | 65                                     | 3                                          |
| Mo <sub>2</sub> C/RGO <sup>7</sup>       | 0.5 M H <sub>2</sub> SO <sub>4</sub>  | 130                                             | 57.3                                   | 0.285                                      |
| MoC <sub>x-2</sub> <sup>8</sup>          | 0.5 M H <sub>2</sub> SO <sub>4</sub>  | 160                                             | 93                                     | 0.354                                      |
| Mo <sub>2</sub> C nanowires <sup>9</sup> | 0.5 M H <sub>2</sub> SO <sub>4</sub>  | 200                                             | 52                                     | 0.21                                       |
| Mo <sub>2</sub> C/CC <sup>10</sup>       | 0.5 M H <sub>2</sub> SO <sub>4</sub>  | 140                                             | 124                                    | 1.5                                        |
| Mo <sub>2</sub> C <sup>11</sup>          | 0.1 M HClO <sub>4</sub>               | >250                                            | 120                                    | 0.28                                       |
| Mo <sub>2</sub> C <sup>12</sup>          | 1 M KOH                               | 176                                             | 58                                     | 0.102                                      |
| Mo <sub>2</sub> C-carbon <sup>13</sup>   | 0.05 M H <sub>2</sub> SO <sub>4</sub> | >270                                            | -                                      | 0.25                                       |
| Mo <sub>2</sub> C <sup>14</sup>          | 1 M H <sub>2</sub> SO <sub>4</sub>    | ~210                                            | 56                                     | 1.4                                        |
| Mo <sub>2</sub> C <sup>14</sup>          | 1 M KOH                               | ~190                                            | 54                                     | 0.8                                        |
| Mo <sub>2</sub> C/C <sup>a</sup>         | 1 M KOH                               | 165                                             | 66.41                                  | 1.0                                        |

$\eta$ : overpotential, GR: graphene, CNTs: carbon nanotubes, a = in this study

## References

- 1 L. Ma, L. R. L. Ting, V. Molinari, C. Giordano, B. S. Yeo, *J. Mater. Chem. A*, 2015, **3**, 8361–8368.
- 2 B. Šljukić, M. Vujković, L. Amaral, D. M. Santos, R. P. Rocha, C. A. Sequeira, J. L. Figueiredo, *J. Mater. Chem. A*, 2015, **3**, 15505-12.
- 3 D. H. Youn, S. Han, J. Y. Kim, J. Y. Kim, H. Park, S. Choi and J. S. Lee, *ACS Nano*, 2014, **8**, 5164–5173.
- 4 W. F. Chen, C. H. Wang, K. Sasaki, N. Marinkovic, W. Xu, J. T. Muckerman, Y. Zhu, R. R. Adzic, *Energy Environ. Sci.*, 2013, **6**, 943–951.
- 5 H. Ang, H. Wang, B. Li, Y. Zong, X. Wang, and Q. Yan, *Small*, 2016, **12**, 2859–2865.
- 6 K. Zhang, Y. Zhao, D. Fu, Y. Chen, *J. Mater. Chem. A*, 2015, **3**, 5783–5788.
- 7 L. F. Pan, Y. H. Li, S. Yang, P. F. Liu, M. Q. Yua, H. G. Yang, *Chem. Commun.*, 2014, **50**, 13135-13137.
- 8 X. Yang, X. Feng, H. Tan, H. Zang, X. Wang, Y. Wang, E. Wang, Y. Li, *J. Mater. Chem. A*, 2016, **4**, 3947–3954.
- 9 L. Liao, S. Wang, J. Xiao, X. Bian, Y. Zhang, M. D. Scanlon, X. Hu, Y. Tang, B. Liu, H. H. Girault, *Energy Environ. Sci.*, 2014, **7**, 387-392.
- 10 M. Fan, H. Chen, Y. Wu, L. L. Feng, Y. Liu, G. D. Li, X. Zou, *J. Mater. Chem. A*, 2015, **3**, 16320-6.
- 11 C. Wan, Y. N. Regmi and B. M. Leonard, *Angew. Chem., Int. Ed.*, 2014, **53**, 6407–6410.
- 12 L. Ma, L. R. Ting, V. Molinari, C. Giordano, B. S. Yeo, *J. Mater. Chem. A*, 2015, **3**, 8361–8368.
- 13 N. S. Alhajri, D. H. Anjum and K. Takanabe, *J. Mater. Chem. A*, 2014, **2**, 10548–10556.
- 14 H. Vrubel and X. L. Hu, *Angew. Chem., Int. Ed.*, 2012, **51**, 12703–12706.
